# Supplementary material
Source: PubMed Central journal article supplement (PMC9015683)
Supplement: NIHMS1752812-supplement-1.pdf [file NIHMS1752812-supplement-1.pdf]

## Supplementary Table-1

List of primers and their sequences used in the study.

| Name:                   | Sequence:                               |
|-------------------------|-----------------------------------------|
| Human GAPDH F (forward) | 5'- TCCACTGGCGTCTTCACC-3'               |
| Human GAPDH R (reverse) | 5'- GGCAGAGATGATGACCCTTTT-3'            |
| Human IFN- $\alpha$ F   | 5'- GAT GGC AAC CAG TTC CAG AAG -3'     |
| Human IFN- $\alpha$ R   | 5'- AAA GAG GTT GAA GAT CTG CTG GAT -3' |
| Human IFN- $\beta$ F    | 5'- CTC CAC TAC AGC TCT TTC CAT -3'     |
| Human IFN- $\beta$ R    | 5'- GTC AAA GTTC ATC CTG TCC TT -3'     |
| Human IL-6 F            | 5'-AGACAGCCACTCACCTCTTCAG-3'            |
| Human IL-6 R            | 5'-TTCTGCCAGTGCCTCTTTGCTG-3'            |
| Human TNF- $\alpha$ F   | 5'-CTCTTCTGCCTGCTGCACTTTG-3'            |
| Human TNF- $\alpha$ R   | 5'-ATGGGCTACAGGCTTGTCACTC-3'            |
| Human CCL5 F            | 5'-TGTACTCCCGAACCCATTTC-3'              |
| Human CCL5 R            | 5'-TACACCAGTGGCAAGTGCTC-3'              |
| Mouse $\beta$ -actin F  | 5'-GACGGCCAGGTCATCACTATTG-3'            |
| Mouse $\beta$ -actin R  | 5'-AGG AAGGCTGGAAAAGAGCC-3'             |
| Mouse IFN- $\alpha$ F   | 5'-CCTGCTGGCTGTGAAAT-3'                 |
| Mouse IFN- $\alpha$ R   | 5'-GACAGGGCTCTCCAGACTTC-3'              |
| Mouse IFN- $\beta$ F    | 5'-TGTCCTCAACTGCTCTCCAC-3'              |
| Mouse IFN- $\beta$ R    | 5'-CATCCAGGCGCTGTTGT-3'                 |
| Mouse IL-6 F            | 5'-ACGGCCTTCCCTACTTCACA-3'              |
| Mouse IL-6 R            | 5'-CATTTCACGATTTCCGAGA-3'               |
| Mouse CXCL10 F          | 5'-ATCATCCCTGCGAGCCTATCCT-3'            |
| Mouse CXCL10 R          | 5'-GACCTTTTTTGGCTAAACGCTTTC-3'          |
| Mouse CCL5 F            | 5'-CCTGCTGCTTTGCCTACCTCTC-3'            |
| Mouse CCL5 R            | 5'-ACACACTTGGCGGTTCTTCGA-3'             |
| HSV-2 gB F              | 5'- GCCTTTTGTGTGTGTGTGGG-3'             |
| HSV-2 gB R              | 5'- GCCTTTTGTGTGTGTGTGGG-3'             |

Supplementary figure1:

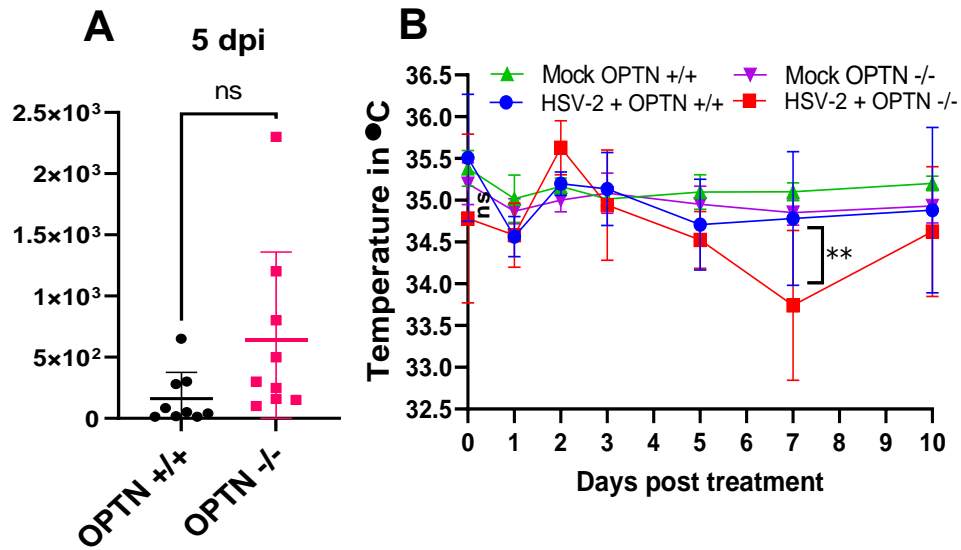

**Supplementary figure1:** (A) Genital swabs were taken from HSV-2 333 infected OPTN +/+ and OPTN -/- animals at 5 day post infection (B) Temperature check was performed on both mock infected and HSV-2 infected groups with digital thermometer at the anal periphery from day 0 to day 10 post infection. Data represent three independent experiments with similar results, n=3-5 samples/group/genotype/condition. Error bar represent means  $\pm$  SEM. Significance was determined by two-way ANOVA with Šídák's multiple comparisons test. \*p < 0.05; \*\*p < 0.01; \*\*\*p < 0.001, \*\*\*\*p < 0.0001, ns, not significant.

**Supplementary figure2:**

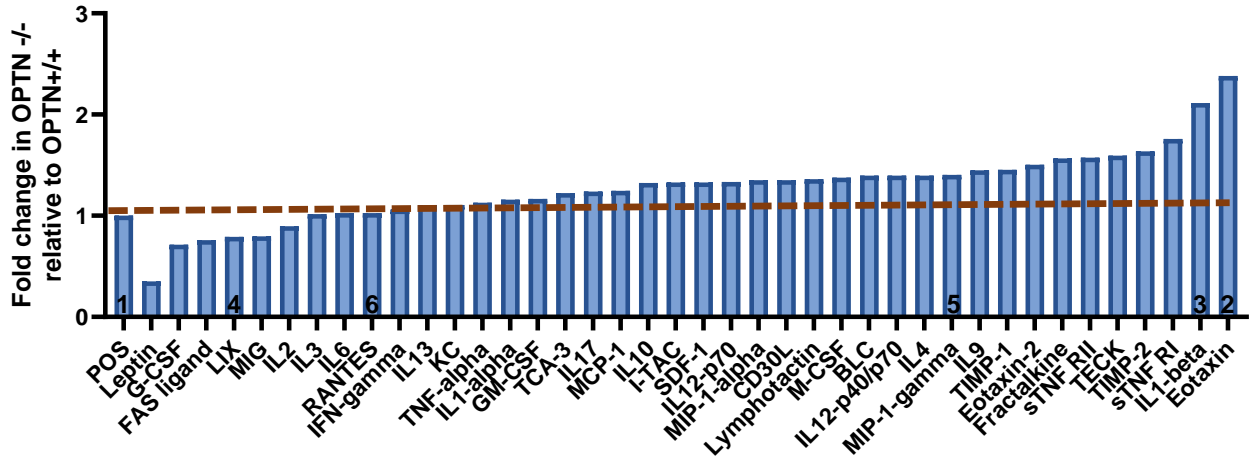

**Supplementary figure 2:** Inflammation antibody array profile of mouse inflammatory proteins in vaginal tissue of OPTN +/+ and OPTN-/- animals infected with  $1 \times 10^6$  PFU HSV-2 333 strain for 24h. Numbers indicate the position of controls and selective cytokines on array; 1 and 7 - Positive control, 2-Eotaxin, 3-IL-1- $\beta$ , 4-Lix, 5-MIP-1-gamma, 6-CCL5.
